# Supplementary material for: Tracking the Antigenic Evolution of Foot-and-Mouth Disease Virus
Source: PubMed Central journal article supplement (PMC4957747; doi:10.1371/journal.pone.0159360), 2016-07-22
Supplement: pone.0159360.s006.pdf [file pone.0159360.s006.pdf]

| Common name | Residue on alignment | O       | A       | C       | Asia1   | SAT1    | SAT2    | SAT3    | count | Serotypes                                                                            |
|-------------|----------------------|---------|---------|---------|---------|---------|---------|---------|-------|--------------------------------------------------------------------------------------|
| VP2 67      | 152                  | VP2 67  | VP2 67  | VP2 67  | VP2 67  | VP2 67  | VP2 67  | VP2 67  | 1     | Asia1 <sup>1</sup>                                                                   |
| VP2 70      | 155                  | VP2 70  | VP2 70  | VP2 70  | VP2 70  | VP2 70  | VP2 70  | VP2 70  | 2     | O <sup>2,3</sup>                                                                     |
| VP2 71      | 156                  | VP2 71  | VP2 71  | VP2 71  | VP2 71  | VP2 71  | VP2 71  | VP2 71  | 1     | O <sup>3</sup>                                                                       |
| VP2 72      | 157                  | VP2 72  | VP2 72  | VP2 72  | VP2 72  | VP2 72  | VP2 72  | VP2 72  | 8     | O <sup>3-5</sup> Asia1 <sup>1</sup> SAT1 <sup>6*</sup> C <sup>7</sup> A <sup>8</sup> |
| VP2 73      | 158                  | VP2 73  | VP2 73  | VP2 73  | VP2 73  | VP2 73  | VP2 73  | VP2 73  | 3     | O <sup>3-5</sup>                                                                     |
| VP2 74      | 159                  | VP2 74  | VP2 74  | VP2 74  | VP2 74  | VP2 74  | VP2 74  | VP2 74  | 4     | C <sup>2,7</sup> Asia1 <sup>1</sup> O*                                               |
| VP2 75      | 160                  | VP2 75  | VP2 75  | VP2 75  | VP2 75  | VP2 75  | VP2 75  | VP2 75  | 1     | O <sup>3</sup>                                                                       |
| VP2 77      | 162                  | VP2 77  | VP2 77  | VP2 77  | VP2 77  | VP2 77  | VP2 77  | VP2 77  | 3     | O <sup>2,3</sup> Asia1 <sup>1</sup>                                                  |
| VP2 78      | 163                  | VP2 78  | VP2 78  | VP2 78  | VP2 78  | VP2 78  | VP2 78  | VP2 78  | 1     | O <sup>9</sup>                                                                       |
| VP2 79      | 164                  | VP2 79  | VP2 79  | VP2 79  | VP2 79  | VP2 79  | VP2 79  | VP2 79  | 6     | A <sup>2,8</sup> C <sup>2,7</sup> Asia1 <sup>1</sup> SAT2 <sup>6</sup>               |
| VP2 80      | 165                  | VP2 80  | VP2 80  | VP2 80  | VP2 80  | VP2 80  | VP2 80  | VP2 80  | 1     | A <sup>10</sup>                                                                      |
| VP2 82      | 167                  | VP2 82  | VP2 82  | VP2 82  | VP2 82  | VP2 82  | VP2 82  | VP2 82  | 1     | A <sup>11</sup>                                                                      |
| VP2 88      | 173                  | VP2 88  | VP2 88  | VP2 88  | VP2 88  | VP2 88  | VP2 88  | VP2 88  | 1     | A <sup>11</sup>                                                                      |
| VP2 130     | 215                  | VP2 130 | VP2 130 | VP2 130 | VP2 130 | VP2 130 | VP2 130 | VP2 130 | 1     | O <sup>12</sup>                                                                      |
| VP2 131     | 216                  | VP2 131 | VP2 131 | VP2 131 | VP2 131 | VP2 131 | VP2 131 | VP2 131 | 1     | O <sup>3</sup>                                                                       |
| VP2 133     | 218                  | VP2 133 | VP2 133 | VP2 133 | VP2 133 | VP2 133 | VP2 133 | VP2 133 | 2     | O <sup>2,5</sup>                                                                     |
| VP2 134     | 219                  | VP2 134 | VP2 134 | VP2 134 | VP2 134 | VP2 134 | VP2 134 | VP2 134 | 2     | O <sup>2,13</sup>                                                                    |
| VP2 190     | 275                  | VP2 188 | VP2 188 | VP2 188 | VP2 188 | VP2 188 | VP2 188 | VP2 188 | 1     | O <sup>9</sup>                                                                       |
| VP2 193     | 278                  | VP2 191 | VP2 191 | VP2 191 | VP2 191 | VP2 191 | VP2 191 | VP2 191 | 1     | O*                                                                                   |
| VP2 194     | 279                  | VP2 191 | VP2 191 | VP2 191 | VP2 191 | VP2 192 | VP2 192 | VP2 192 | 1     | O*                                                                                   |

Table S3: (a) Residues identified as part of epitopes on structural protein VP2 across the six tested serotypes of FMDV, along with corresponding positions on all serotypes. \* Identified as antigenically important for neutralisation in this study.

| Common name | Residue on alignment | O       | A       | C       | Asia1   | SAT1    | SAT2    | SAT3    | count | Serotypes                                                                |
|-------------|----------------------|---------|---------|---------|---------|---------|---------|---------|-------|--------------------------------------------------------------------------|
| VP3 56      | 362                  | VP3 56  | VP3 56  | VP3 56  | VP3 56  | VP3 56  | VP3 56  | VP3 55  | 2     | O <sup>3*</sup>                                                          |
| VP3 58      | 364                  | VP3 58  | VP3 58  | VP3 58  | VP3 58  | VP3 58  | VP3 58  | VP3 57  | 9     | A <sup>2,10</sup> O <sup>2-4,9</sup> C <sup>2,7</sup> Asia1 <sup>1</sup> |
| VP3 59      | 365                  | VP3 59  | VP3 59  | VP3 59  | VP3 58  | VP3 58  | VP3 58  | VP3 57  | 2     | Asia1 <sup>1</sup> A <sup>10</sup>                                       |
| VP3 60      | 366                  | VP3 60  | VP3 60  | VP3 59  | VP3 59  | VP3 59  | VP3 59  | VP3 58  | 1     | Asia1 <sup>1</sup>                                                       |
| VP3 61      | 367                  | VP3 61  | VP3 61  | VP3 60  | VP3 60  | VP3 60  | VP3 60  | VP3 59  | 1     | A <sup>10</sup>                                                          |
| VP3 71      | 377                  | VP3 70  | VP3 70  | VP3 69  | VP3 69  | VP3 70  | VP3 69  | VP3 69  | 1     | A <sup>10</sup>                                                          |
| VP3 72      | 378                  | VP3 71  | VP3 71  | VP3 70  | VP3 70  | VP3 71  | VP3 70  | VP3 70  | 2     | SAT1 <sup>6*</sup>                                                       |
| VP3 77      | 383                  | VP3 76  | VP3 76  | VP3 75  | VP3 75  | VP3 76  | VP3 75  | VP3 75  | 2     | SAT1 <sup>6*</sup>                                                       |
| VP3 138     | 444                  | VP3 134 | VP3 135 | VP3 133 | VP3 133 | VP3 135 | VP3 136 | VP3 134 | 2     | SAT1 <sup>6*</sup>                                                       |
| VP3 142     | 448                  | VP3 138 | VP3 139 | VP3 137 | VP3 137 | VP3 139 | VP3 140 | VP3 138 | 1     | A <sup>10</sup>                                                          |
| VP3 177     | 483                  | VP3 173 | VP3 174 | VP3 172 | VP3 172 | VP3 174 | VP3 175 | VP3 173 | 1     | O <sup>12</sup>                                                          |
| VP3 178     | 484                  | VP3 174 | VP3 175 | VP3 173 | VP3 173 | VP3 175 | VP3 176 | VP3 174 | 1     | A <sup>14</sup>                                                          |
| VP3 181     | 487                  | VP3 177 | VP3 178 | VP3 176 | VP3 176 | VP3 178 | VP3 179 | VP3 177 | 1     | A <sup>14</sup>                                                          |
| VP3 198     | 504                  | VP3 194 | VP3 195 | VP3 193 | VP3 193 | VP3 195 | VP3 196 | VP3 194 | 1     | A <sup>10</sup>                                                          |
| VP3 223     | 529                  | VP3 219 | VP3 220 | VP3 218 | VP3 218 | VP3 220 | VP3 221 | VP3 219 | 1     | Asia1 <sup>1</sup>                                                       |

Table S3: (b) Residues identified as part of epitopes on structural protein VP3 across the six tested serotypes of FMDV, along with corresponding positions on all serotypes. \* Identified as antigenically important for neutralisation in this study.

| Common name | Residue on alignment | O       | A       | C       | Asia1   | SAT1    | SAT2    | SAT3    | count | Serotypes                                                   |
|-------------|----------------------|---------|---------|---------|---------|---------|---------|---------|-------|-------------------------------------------------------------|
| VP1 44      | 574                  | VP1 43  | VP1 43  | VP1 43  | VP1 43  | VP1 43  | VP1 42  | VP1 43  | 3     | O <sup>3,4,13</sup>                                         |
| VP1 45      | 575                  | VP1 44  | VP1 44  | VP1 44  | VP1 44  | VP1 44  | VP1 43  | VP1 44  | 2     | O <sup>3,4</sup>                                            |
| VP1 46      | 576                  | VP1 44  | VP1 44  | VP1 44  | VP1 44  | VP1 45  | VP1 44  | VP1 45  | 2     | O <sup>3,4</sup>                                            |
| VP1 47      | 577                  | VP1 45  | VP1 45  | VP1 45  | VP1 45  | VP1 46  | VP1 45  | VP1 46  | 1     | O <sup>3</sup>                                              |
| VP1 48      | 578                  | VP1 46  | VP1 46  | VP1 46  | VP1 46  | VP1 47  | VP1 46  | VP1 47  | 1     | O <sup>9</sup>                                              |
| VP1 50      | 580                  | VP1 48  | VP1 48  | VP1 48  | VP1 48  | VP1 49  | VP1 48  | VP1 48  | 1     | O <sup>13</sup>                                             |
| VP1 114     | 644                  | VP1 110 | VP1 110 | VP1 110 | VP1 110 | VP1 111 | VP1 110 | VP1 110 | 1     | SAT1 <sup>6</sup>                                           |
| VP1 140     | 670                  | VP1 136 | VP1 136 | VP1 136 | VP1 136 | VP1 137 | VP1 136 | VP1 136 | 1     | A <sup>15</sup>                                             |
| VP1 141     | 671                  | VP1 137 | VP1 136 | VP1 136 | VP1 137 | VP1 138 | VP1 137 | VP1 137 | 1     | A <sup>15</sup>                                             |
| VP1 142     | 672                  | VP1 138 | VP1 137 | VP1 137 | VP1 138 | VP1 139 | VP1 138 | VP1 138 | 1     | O*                                                          |
| VP1 143     | 673                  | VP1 139 | VP1 138 | VP1 138 | VP1 139 | VP1 140 | VP1 138 | VP1 138 | 3     | C <sup>16,17</sup> A <sup>15</sup>                          |
| VP1 144     | 674                  | VP1 140 | VP1 139 | VP1 139 | VP1 140 | VP1 141 | VP1 139 | VP1 139 | 5     | C <sup>7,16</sup> Asia1 <sup>1</sup> SAT1 <sup>6*</sup>     |
| VP1 145     | 675                  | VP1 141 | VP1 140 | VP1 140 | VP1 141 | VP1 142 | VP1 140 | VP1 140 | 2     | A <sup>15</sup> Asia1 <sup>1</sup>                          |
| VP1 146     | 676                  | VP1 142 | VP1 141 | VP1 141 | VP1 141 | VP1 143 | VP1 141 | VP1 141 | 2     | A <sup>18</sup> Asia1 <sup>1</sup>                          |
| VP1 147     | 677                  | VP1 143 | VP1 142 | VP1 141 | VP1 141 | VP1 144 | VP1 141 | VP1 142 | 2     | A <sup>15</sup> Asia1 <sup>1</sup>                          |
| VP1 148     | 678                  | VP1 143 | VP1 142 | VP1 141 | VP1 141 | VP1 145 | VP1 141 | VP1 143 | 2     | A <sup>15</sup> Asia1 <sup>1</sup>                          |
| VP1 149     | 679                  | VP1 143 | VP1 142 | VP1 141 | VP1 141 | VP1 146 | VP1 141 | VP1 143 | 4     | A <sup>15</sup> Asia1 <sup>1</sup> SAT1 <sup>6*</sup>       |
| VP1 150     | 680                  | VP1 143 | VP1 142 | VP1 141 | VP1 141 | VP1 147 | VP1 142 | VP1 144 | 2     | A <sup>15</sup> Asia1 <sup>1</sup>                          |
| VP1 151     | 681                  | VP1 144 | VP1 143 | VP1 141 | VP1 142 | VP1 148 | VP1 143 | VP1 145 | 6     | A <sup>10,18+</sup> O <sup>3,19,20</sup> Asia1 <sup>1</sup> |
| VP1 153     | 683                  | VP1 146 | VP1 145 | VP1 142 | VP1 144 | VP1 150 | VP1 145 | VP1 147 | 2     | O <sup>21</sup> A <sup>10+</sup>                            |
| VP1 155     | 685                  | VP1 148 | VP1 147 | VP1 144 | VP1 146 | VP1 152 | VP1 147 | VP1 149 | 7     | A <sup>10,15,18+</sup> O <sup>3,4,19,20</sup>               |
| VP1 156     | 686                  | VP1 149 | VP1 148 | VP1 145 | VP1 147 | VP1 153 | VP1 148 | VP1 150 | 4     | A <sup>10,15,18+</sup> O <sup>4</sup>                       |
| VP1 157     | 687                  | VP1 150 | VP1 149 | VP1 146 | VP1 148 | VP1 154 | VP1 149 | VP1 151 | 3     | C <sup>7,16</sup> SAT2 <sup>22</sup>                        |
| VP1 158     | 688                  | VP1 151 | VP1 150 | VP1 147 | VP1 149 | VP1 155 | VP1 150 | VP1 152 | 2     | C <sup>17</sup> A <sup>10+</sup>                            |
| VP1 159     | 689                  | VP1 152 | VP1 151 | VP1 148 | VP1 150 | VP1 156 | VP1 151 | VP1 153 | 4     | C <sup>23</sup> A <sup>10,14,15+</sup>                      |
| VP1 160     | 690                  | VP1 153 | VP1 152 | VP1 149 | VP1 151 | VP1 157 | VP1 152 | VP1 154 | 4     | A <sup>10,14,15+</sup> C <sup>7</sup>                       |
| VP1 161     | 691                  | VP1 154 | VP1 153 | VP1 150 | VP1 152 | VP1 158 | VP1 153 | VP1 155 | 4     | C <sup>16</sup> O <sup>3,19</sup> A <sup>10+</sup>          |
| VP1 162     | 692                  | VP1 155 | VP1 154 | VP1 151 | VP1 153 | VP1 159 | VP1 154 | VP1 156 | 2     | SAT2 <sup>6</sup> A <sup>10+</sup>                          |
| VP1 164     | 694                  | VP1 157 | VP1 156 | VP1 153 | VP1 155 | VP1 161 | VP1 156 | VP1 158 | 2     | SAT2 <sup>22</sup> SAT1*                                    |
| VP1 165     | 695                  | VP1 157 | VP1 156 | VP1 153 | VP1 155 | VP1 161 | VP1 156 | VP1 159 | 2     | SAT2 <sup>22</sup> SAT1*                                    |
| VP1 167     | 697                  | VP1 157 | VP1 156 | VP1 153 | VP1 155 | VP1 163 | VP1 158 | VP1 161 | 1     | SAT2 <sup>22</sup>                                          |
| VP1 169     | 699                  | VP1 158 | VP1 157 | VP1 154 | VP1 156 | VP1 164 | VP1 160 | VP1 163 | 1     | O*                                                          |

| Common name | Residue on alignment | O       | A       | C       | Asia1   | SAT1    | SAT2    | SAT3    | count | Serotypes                                      |
|-------------|----------------------|---------|---------|---------|---------|---------|---------|---------|-------|------------------------------------------------|
| VP1 182     | 712                  | VP1 171 | VP1 170 | VP1 167 | VP1 169 | VP1 177 | VP1 173 | VP1 176 | 1     | A <sup>10</sup>                                |
| VP1 184     | 714                  | VP1 173 | VP1 172 | VP1 169 | VP1 171 | VP1 179 | VP1 175 | VP1 177 | 1     | SAT1 <sup>6</sup>                              |
| VP1 185     | 715                  | VP1 174 | VP1 173 | VP1 170 | VP1 172 | VP1 180 | VP1 176 | VP1 178 | 1     | A <sup>14</sup>                                |
| VP1 186     | 716                  | VP1 175 | VP1 174 | VP1 171 | VP1 173 | VP1 181 | VP1 177 | VP1 179 | 1     | SAT1 <sup>6</sup>                              |
| VP1 209     | 739                  | VP1 196 | VP1 196 | VP1 192 | VP1 194 | VP1 204 | VP1 200 | VP1 202 | 1     | SAT1*                                          |
| VP1 210     | 740                  | VP1 197 | VP1 197 | VP1 193 | VP1 195 | VP1 205 | VP1 201 | VP1 202 | 2     | C <sup>2,7</sup>                               |
| VP1 211     | 741                  | VP1 198 | VP1 198 | VP1 194 | VP1 196 | VP1 206 | VP1 202 | VP1 203 | 4     | C <sup>23</sup> O <sup>5*</sup> A <sup>8</sup> |
| VP1 214     | 744                  | VP1 201 | VP1 201 | VP1 197 | VP1 199 | VP1 209 | VP1 205 | VP1 206 | 1     | A <sup>14</sup>                                |
| VP1 216     | 746                  | VP1 203 | VP1 203 | VP1 199 | VP1 201 | VP1 211 | VP1 206 | VP1 208 | 1     | A <sup>24</sup>                                |
| VP1 218     | 748                  | VP1 205 | VP1 205 | VP1 201 | VP1 203 | VP1 213 | VP1 208 | VP1 210 | 1     | A <sup>10+</sup>                               |
| VP1 219     | 749                  | VP1 206 | VP1 206 | VP1 202 | VP1 204 | VP1 214 | VP1 209 | VP1 211 | 1     | O <sup>21</sup>                                |
| VP1 220     | 750                  | VP1 207 | VP1 207 | VP1 203 | VP1 205 | VP1 215 | VP1 210 | VP1 212 | 2     | O <sup>21</sup> SAT2 <sup>6</sup>              |
| VP1 221     | 751                  | VP1 208 | VP1 208 | VP1 204 | VP1 206 | VP1 216 | VP1 211 | VP1 213 | 1     | O <sup>19</sup>                                |
| VP1 222     | 752                  | VP1 209 | VP1 209 | VP1 205 | VP1 207 | VP1 217 | VP1 212 | VP1 214 | 1     | A <sup>14</sup>                                |

Table S3: (c) Residues identified as part of epitopes on structural protein VP1 across all seven serotypes of FMDV, along with corresponding positions on other serotypes. \* Identified as antigenically important for neutralisation in this study. + A<sub>1061</sub> has a deletion at residue 677 on this alignment. Serotype A numbering is relative to the other serotype A viruses without the deletion.

## References

- [1] Santina Grazioli, Francesca Fallacara, and Emiliana Brocchi. Mapping of antigenic sites of foot-and-mouth disease virus serotype Asia 1 and relationships with sites described in other serotypes. *The Journal of general virology*, 94(Pt 3):559–569, March 2013.
- [2] Mauricio Mateu, J Hernandez, Miguel Martínez, D Feigelstock, Susan Lea, J Perez, Ernest Giralt, David Stuart, Eduardo Palma, and Esteban Domingo. Antigenic heterogeneity of a foot-and-mouth disease virus serotype in the field is mediated by very limited sequence variation at several antigenic sites. *Journal of Virology*, 68(3):1407–1417, March 1994.
- [3] Jeremy Kitson, David McCahon, and Graham Belsham. Sequence analysis of monoclonal antibody resistant mutants of type O foot and mouth disease virus: evidence for the involvement of the three surface exposed capsid proteins in four antigenic sites. *Virology*, 179(1):26–34, November 1990.
- [4] John Crowther, S Farias, W Carpenter, and Alan Samuel. Identification of a fifth neutralizable site on type O foot-and-mouth disease virus following characterization of single and quintuple monoclonal antibody escape mutants. *The Journal of general virology*, 74 ( Pt 8):1547–1553, August 1993.
- [5] S Aktas and A R Samuel. Identification of antigenic epitopes on the foot and mouth disease virus isolate O-1/Manisa/Turkey/69 using monoclonal antibodies. *Revue Scientifique Et Technique De L Office International Des Epizooties*, 19(3):744–753, 2000.
- [6] Santina Grazioli, Marcella Moretti, Ilaria Barbieri, Marialuisa Crosatti, and Emiliana Brocchi. Use of monoclonal antibodies to identify and map new antigenic determinants involved in neutralisation on FMD viruses type SAT 1 and SAT 2. *Report of the Session of the Research Group of the Standing Technical Committee of the European Commission for the Control of Foot-and-Mouth Disease*, Appendix 43:287–297, 2006.
- [7] Susan Lea, J Hernandez, Wendy Blakemore, Emiliana Brocchi, Stephen Curry, Esteban Domingo, Elizabeth Fry, Robin Abu Ghazaleh, Andrew King, John Newman, David Stuart, and Mauricio Mateu. The structure and antigenicity of a type C foot-and-mouth disease virus. *Structure*, 2(2):123–139, February 1994.
- [8] J C Saiz, M J Gonzalez, M V Borca, F Sobrino, and D M Moore. Identification of neutralizing antigenic sites on VP1 and VP2 of type A5 foot-and-mouth disease virus, defined by neutralization-resistant variants. *Journal of Virology*, 65(5):2518–2524, May 1991.
- [9] Paul V Barnett, Alan Samuel, L Pullen, D Ansell, R N Butcher, and R M Parkhouse. Monoclonal antibodies, against O1 serotype foot-and-mouth disease virus, from a natural bovine host, recognize similar antigenic features to those defined by the mouse. *The Journal of general virology*, 79 ( Pt 7):1687–1697, July 1998.
- [10] A Thomas, R Woortmeijer, W Puijk, and S Barteling. Antigenic sites on foot-and-mouth disease virus type A10. *Journal of Virology*, 62(8):2782–2789, August 1988.
- [11] C Bolwell, A L Brown, Paul V Barnett, R O Campbell, B E Clarke, N R Parry, E J Ouldrige, F Brown, and D J Rowlands. Host cell selection of antigenic variants of foot-and-mouth disease virus. *The Journal of general virology*, 70 ( Pt 1):45–57, January 1989.
- [12] E Pfaff, H J Thiel, E Beck, K Strohmaier, and H Schaller. Analysis of neutralizing epitopes on foot-and-mouth disease virus. *Journal of Virology*, 62(6):2033–2040, June 1988.
- [13] Paul V Barnett, Elizabeth Ouldrige, David Rowlands, Fred Brown, and Nigel Parry. Neutralizing epitopes of type O foot-and-mouth disease virus. I. Identification and characterization of three functionally independent, conformational sites. *The Journal of general virology*, 70 ( Pt 6):1483–1491, June 1989.
- [14] B Baxt, V Vakharia, D Moore, A Franke, and D Morgan. Analysis of neutralizing antigenic sites on the surface of type A12 foot-and-mouth disease virus. *Journal of Virology*, 63(5):2143–2151, May 1989.

- [15] C Bolwell, B E Clarke, N R Parry, E J Ouldrige, F Brown, and D J Rowlands. Epitope mapping of foot-and-mouth disease virus with neutralizing monoclonal antibodies. *The Journal of general virology*, 70 ( Pt 1):59–68, January 1989.
- [16] M G Mateu, M A Martínez, L Capucci, D Andreu, E Giralt, F Sobrino, E Brocchi, and E Domingo. A single amino acid substitution affects multiple overlapping epitopes in the major antigenic site of foot-and-mouth disease virus of serotype C. *The Journal of general virology*, 71 ( Pt 3):629–637, March 1990.
- [17] M G Mateu, M A Martínez, E Rocha, D Andreu, J Parejo, E Giralt, F Sobrino, and E Domingo. Implications of a quasispecies genome structure: effect of frequent, naturally occurring amino acid substitutions on the antigenicity of foot-and-mouth disease virus. *Proceedings of the National Academy of Sciences of the United States of America*, 86(15):5883–5887, August 1989.
- [18] M Mahapatra, C Seki, Sasmita Upadhyaya, Paul V Barnett, José La Torre, and David James Paton. Characterisation and epitope mapping of neutralising monoclonal antibodies to A24 Cruzeiro strain of FMDV. *Veterinary Microbiology*, 149(1-2):242–247, April 2011.
- [19] Q Xie, David McCahon, John Crowther, Graham Belsham, and Kenneth McCullough. Neutralization of foot-and-mouth disease virus can be mediated through any of at least three separate antigenic sites. *The Journal of general virology*, 68 ( Pt 6):1637–1647, June 1987.
- [20] J Stave, J Card, D Morgan, and V Vakharia. Neutralization sites of type O1 foot-and-mouth disease virus defined by monoclonal antibodies and neutralization-escape virus variants. *Virology*, 162(1):21–29, 1988.
- [21] Nigel Parry, Paul V Barnett, E J Ouldrige, David Rowlands, and Fred Brown. Neutralizing epitopes of type O foot-and-mouth disease virus. II. Mapping three conformational sites with synthetic peptide reagents. *The Journal of general virology*, 70 ( Pt 6):1493–1503, June 1989.
- [22] John Crowther, C Rowe, and R Butcher. Characterization of monoclonal antibodies against a type SAT 2 foot-and-mouth disease virus. *Epidemiology and Infection*, 111(2):391–406, October 1993.
- [23] J Díez, M Dávila, C Escarmís, M G Mateu, J Dominguez, J J Pérez, E Giralt, J A Melero, and E Domingo. Unique amino acid substitutions in the capsid proteins of foot-and-mouth disease virus from a persistent infection in cell culture. *Journal of Virology*, 64(11):5519–5528, November 1990.
- [24] J C Saiz, M J Gonzalez, D O Morgan, J L Card, F Sobrino, and D M Moore. Antigenic comparison of different foot-and-mouth disease virus types using monoclonal antibodies defining multiple neutralizing epitopes on FMDV A5 subtypes. *Virus Research*, 13(1):45–60, May 1989.
